# Supplementary material
Source: PubMed Central journal article supplement (PMC3657760)

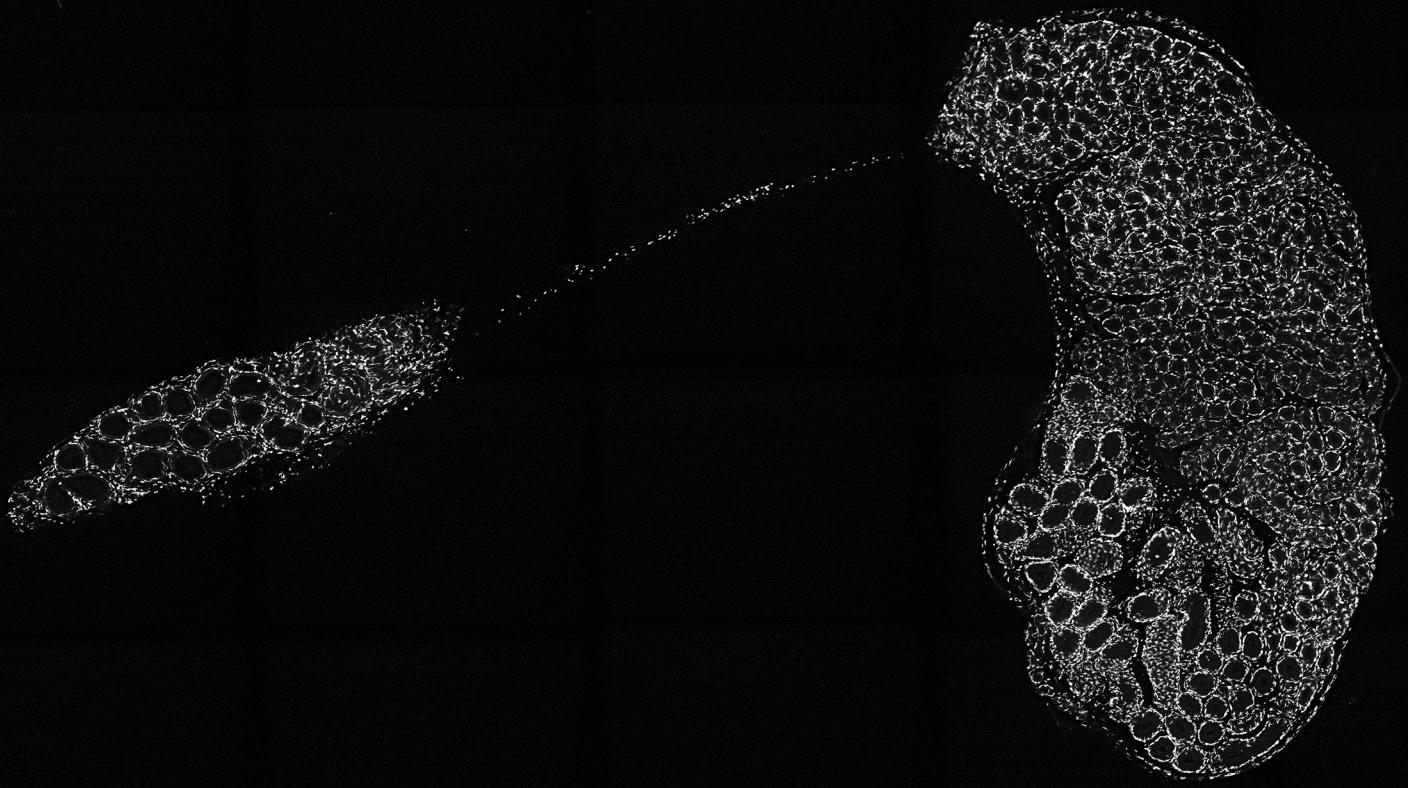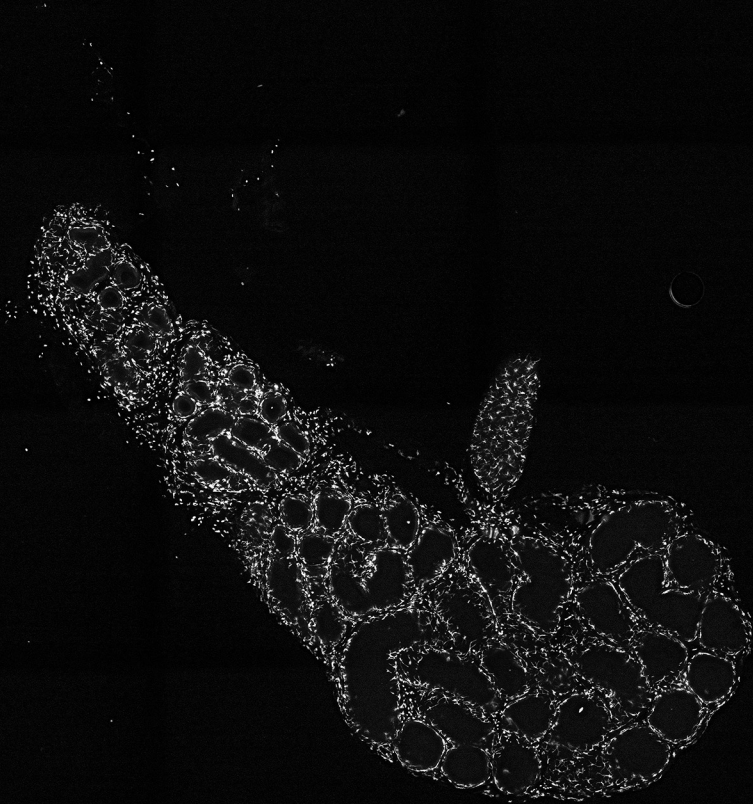

Supplement: NIHMS460533-supplement-Supplementary_Figure_1.pdf [file NIHMS460533-supplement-Supplementary_Figure_1.pdf]

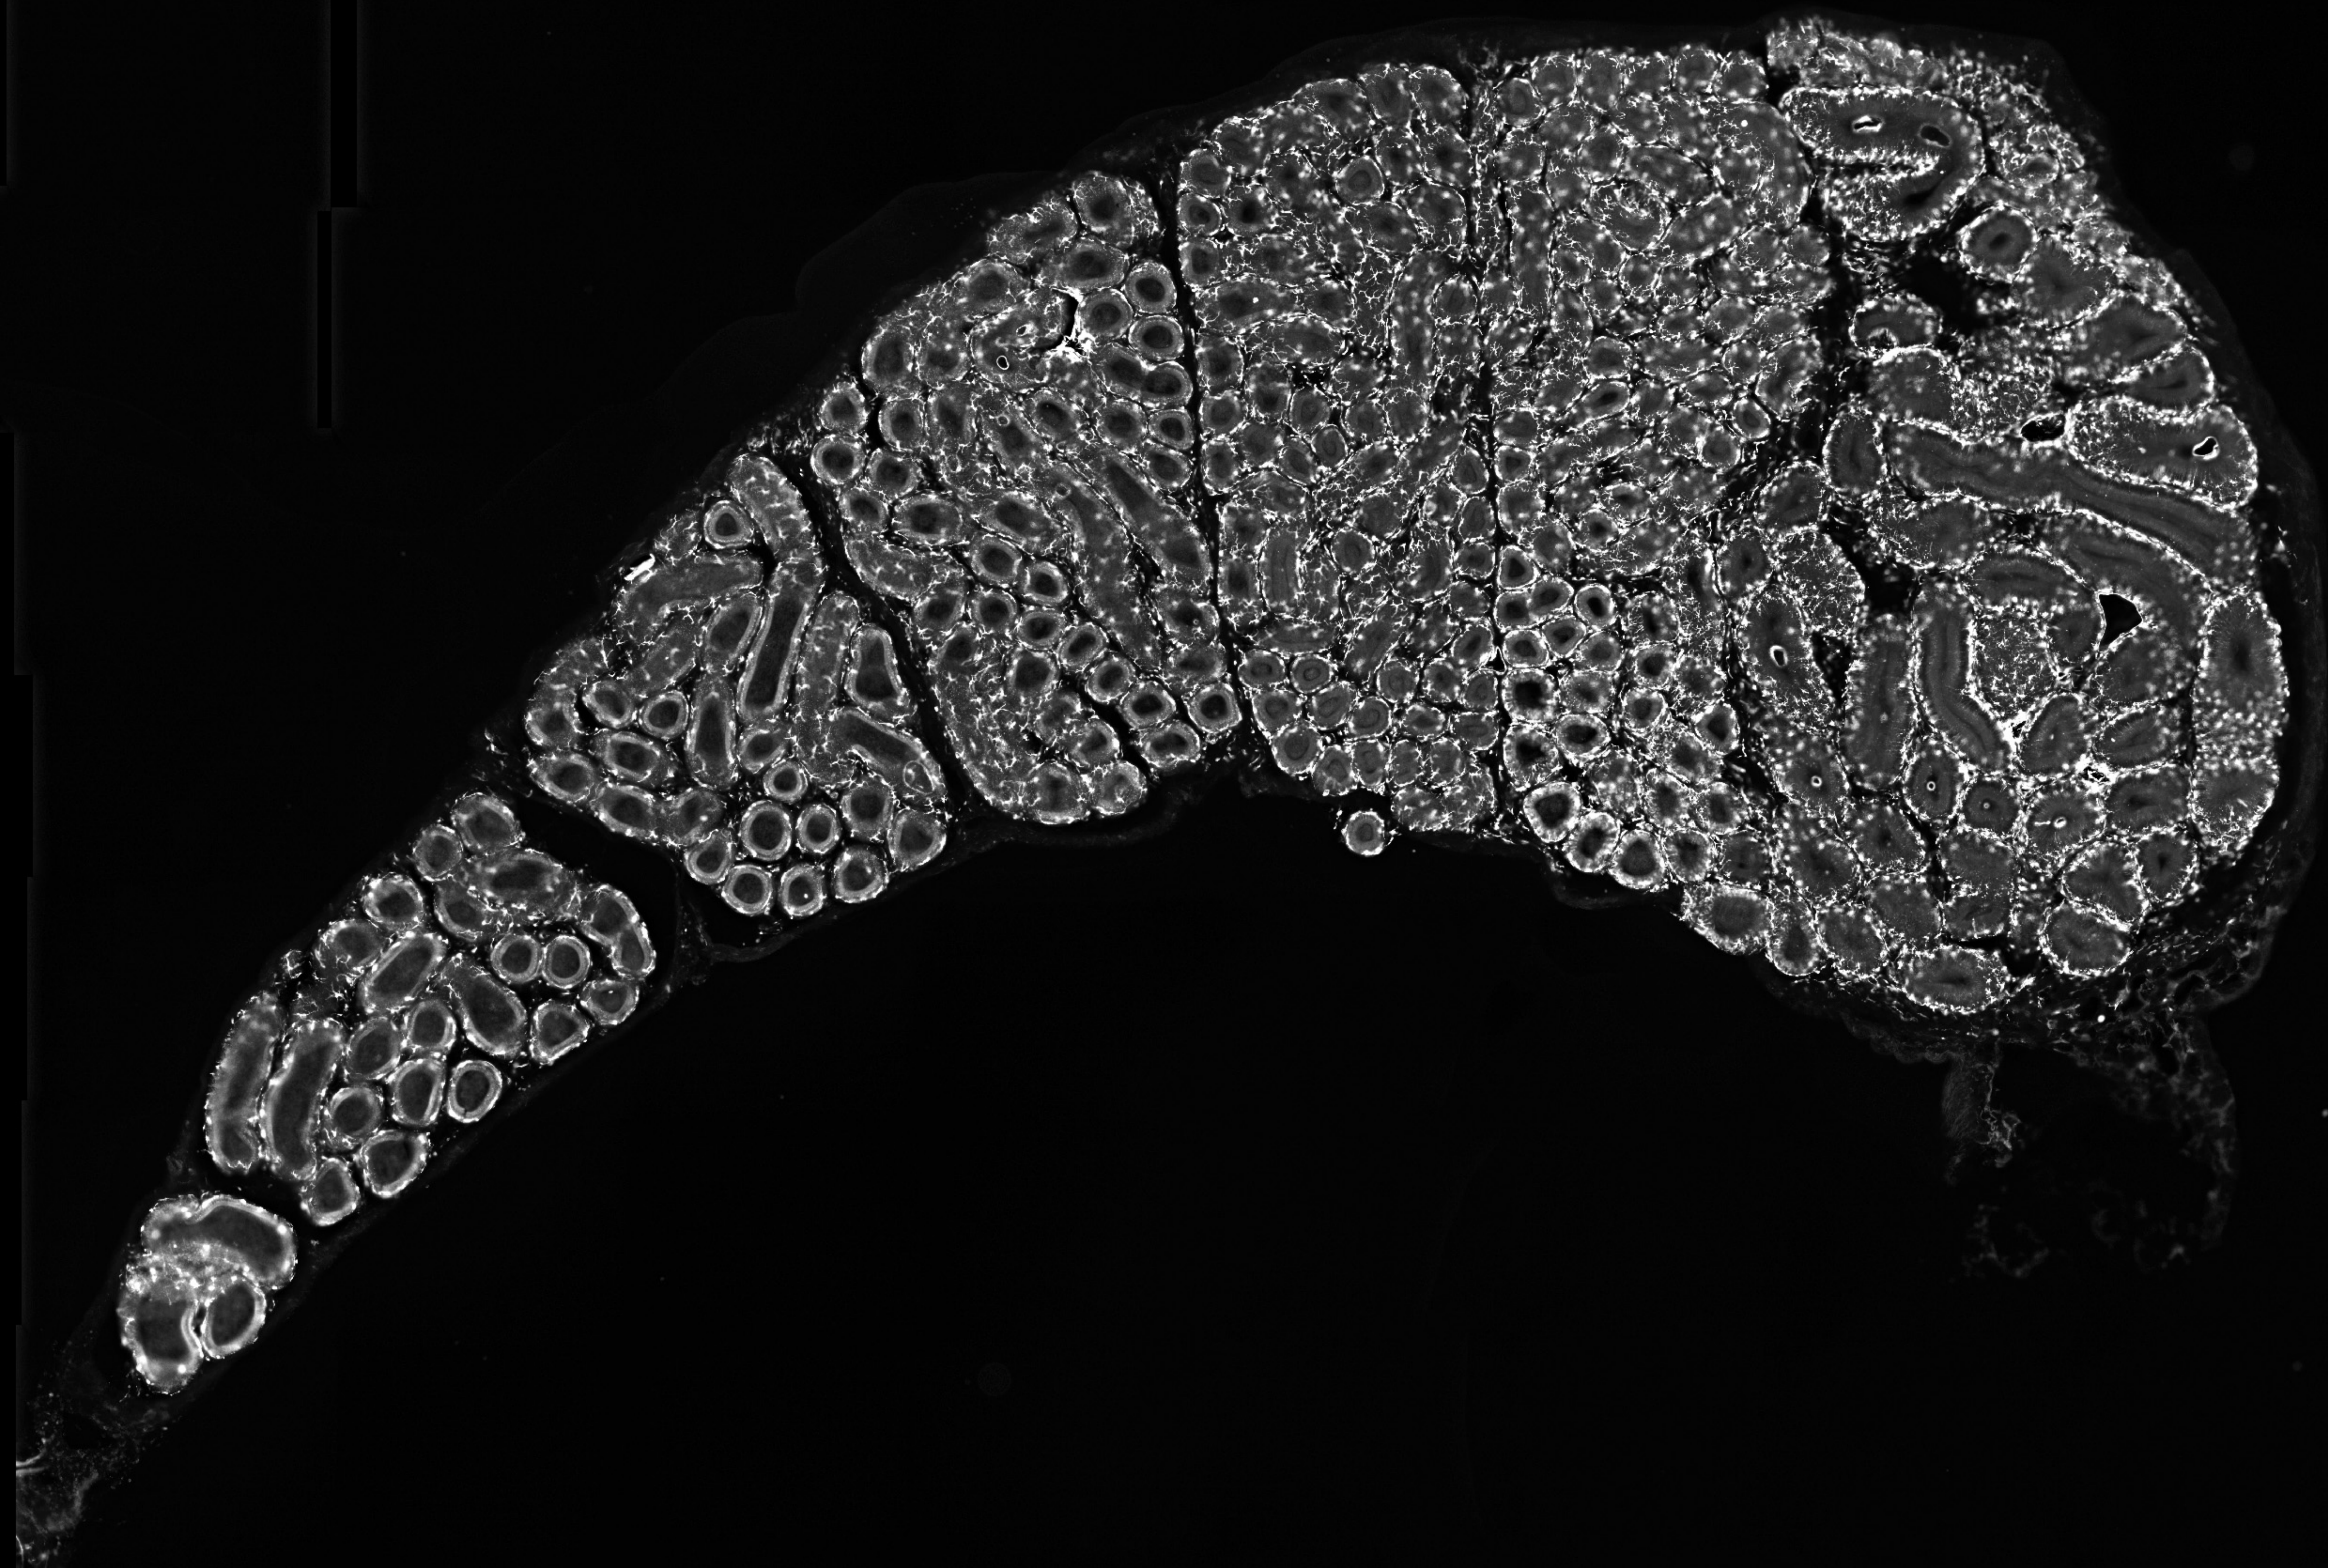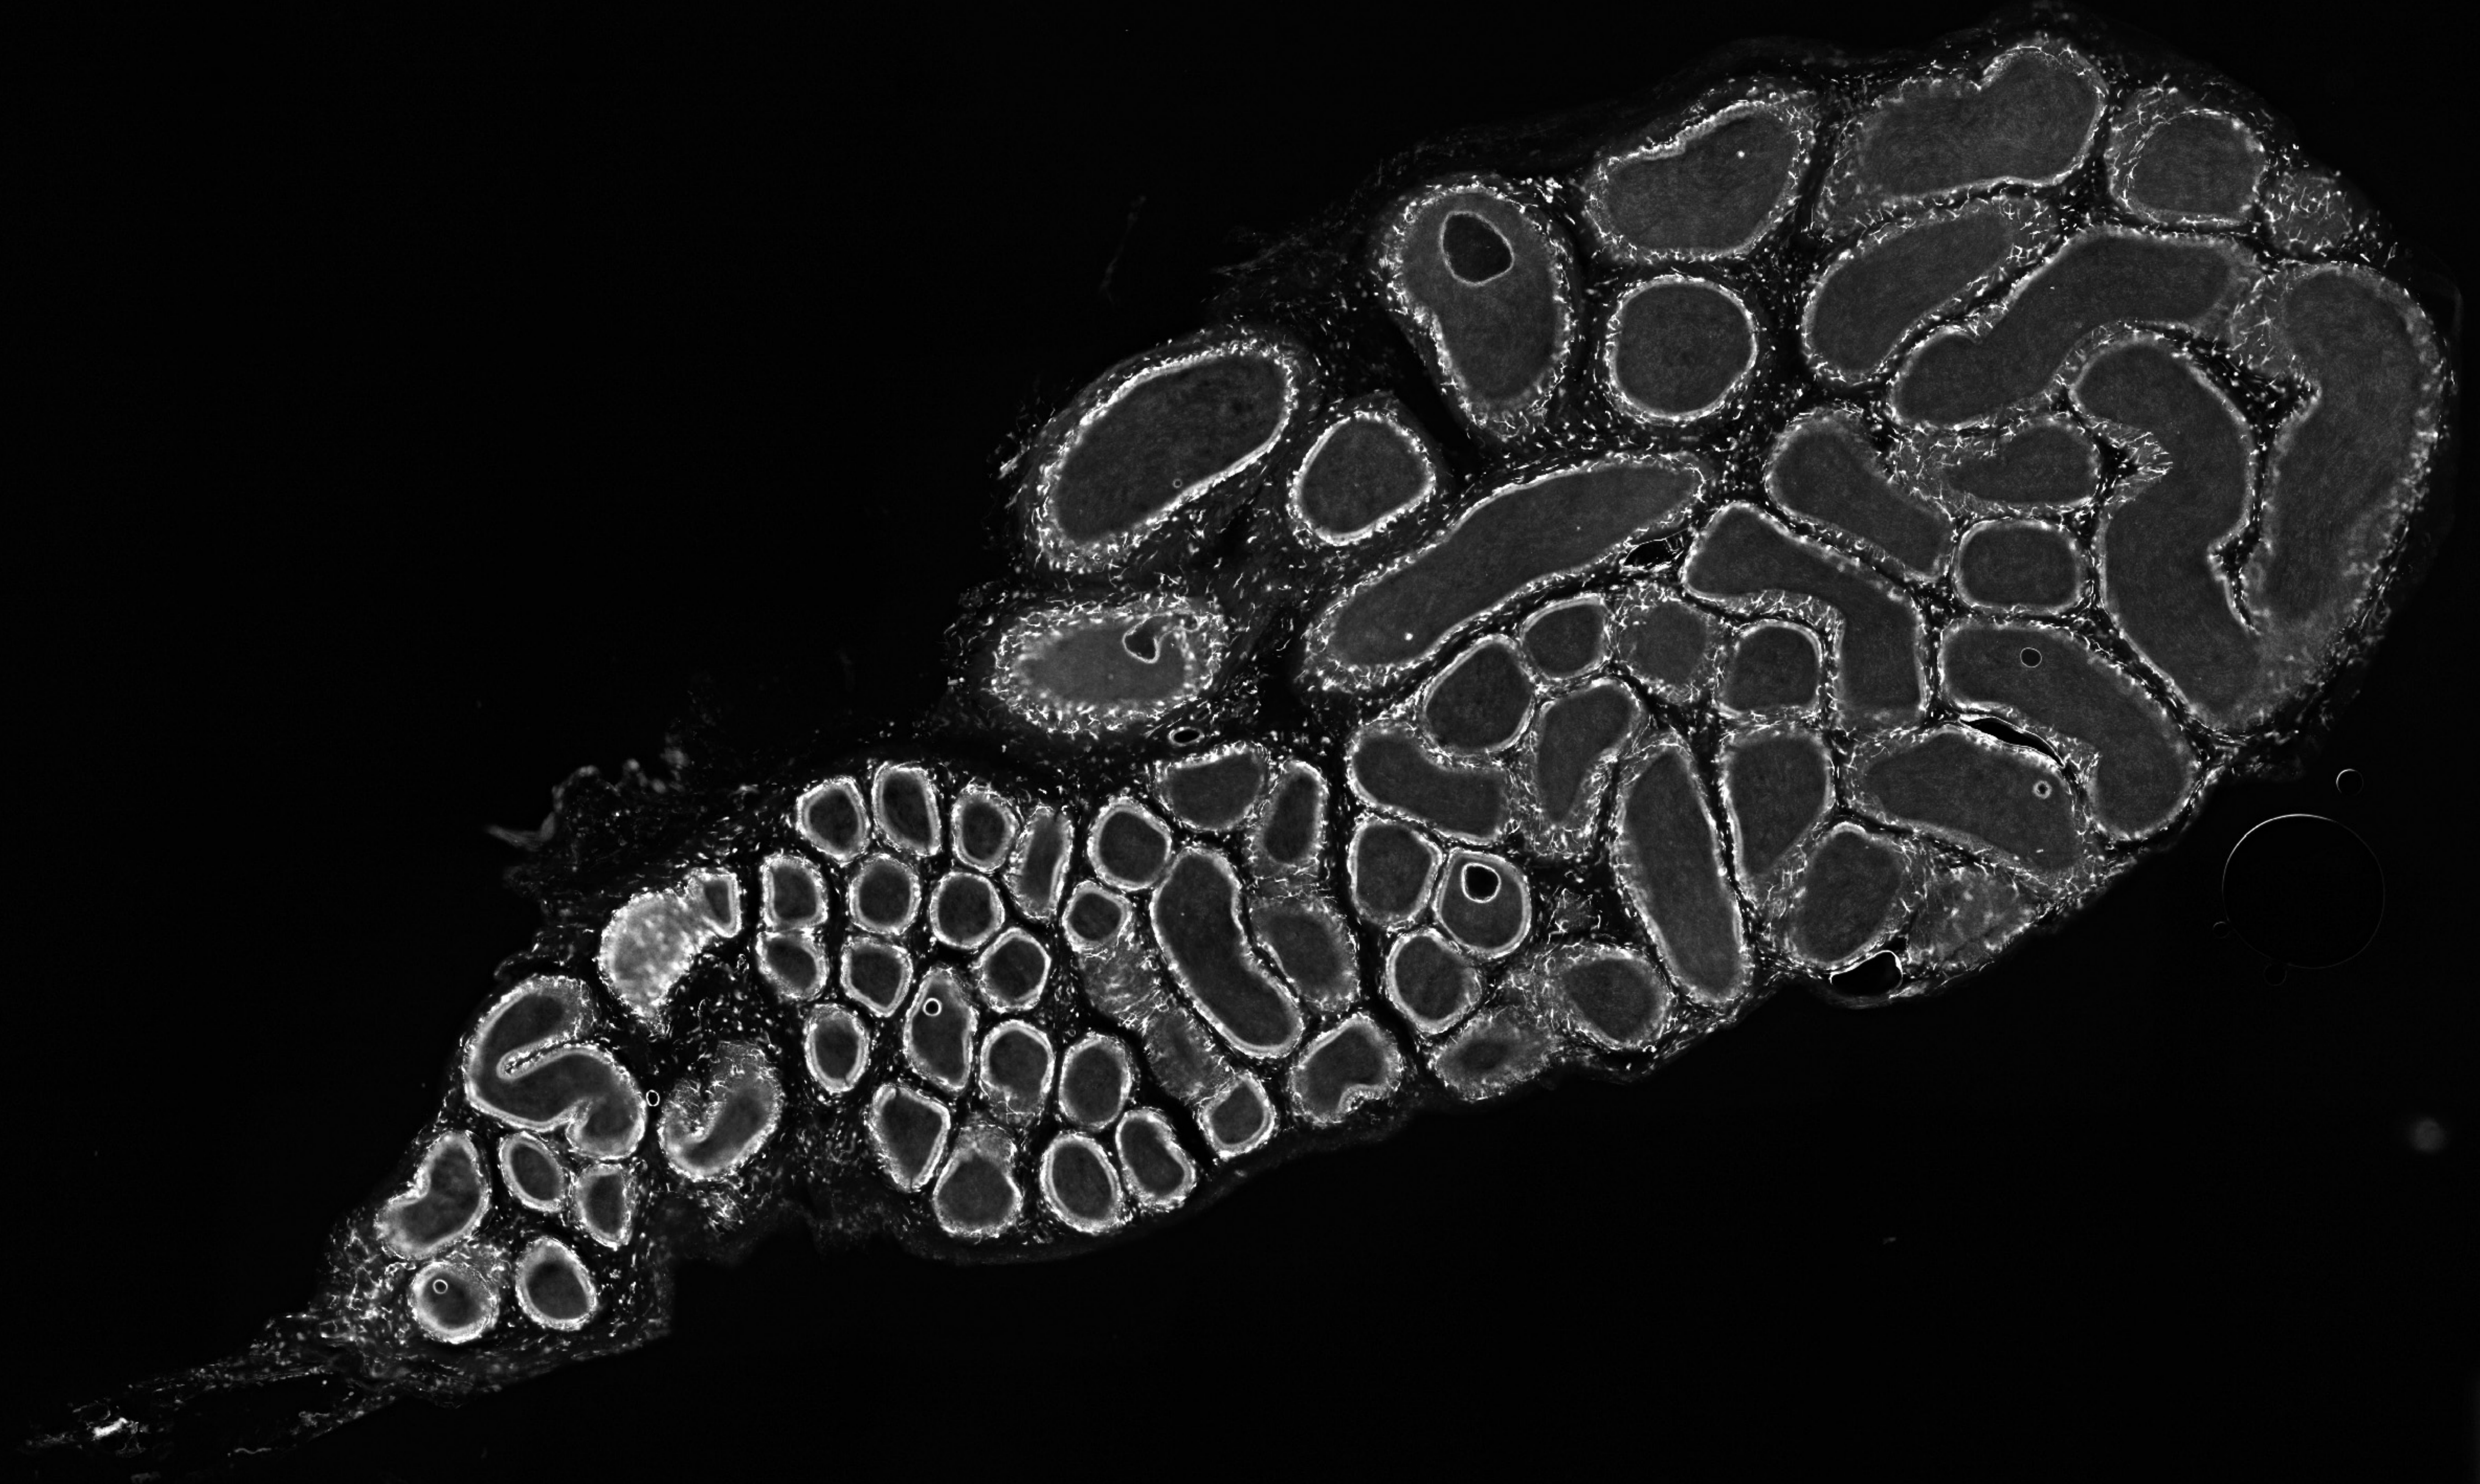

Supplement: NIHMS460533-supplement-Supplementary_Figure_2.pdf [file NIHMS460533-supplement-Supplementary_Figure_2.pdf]

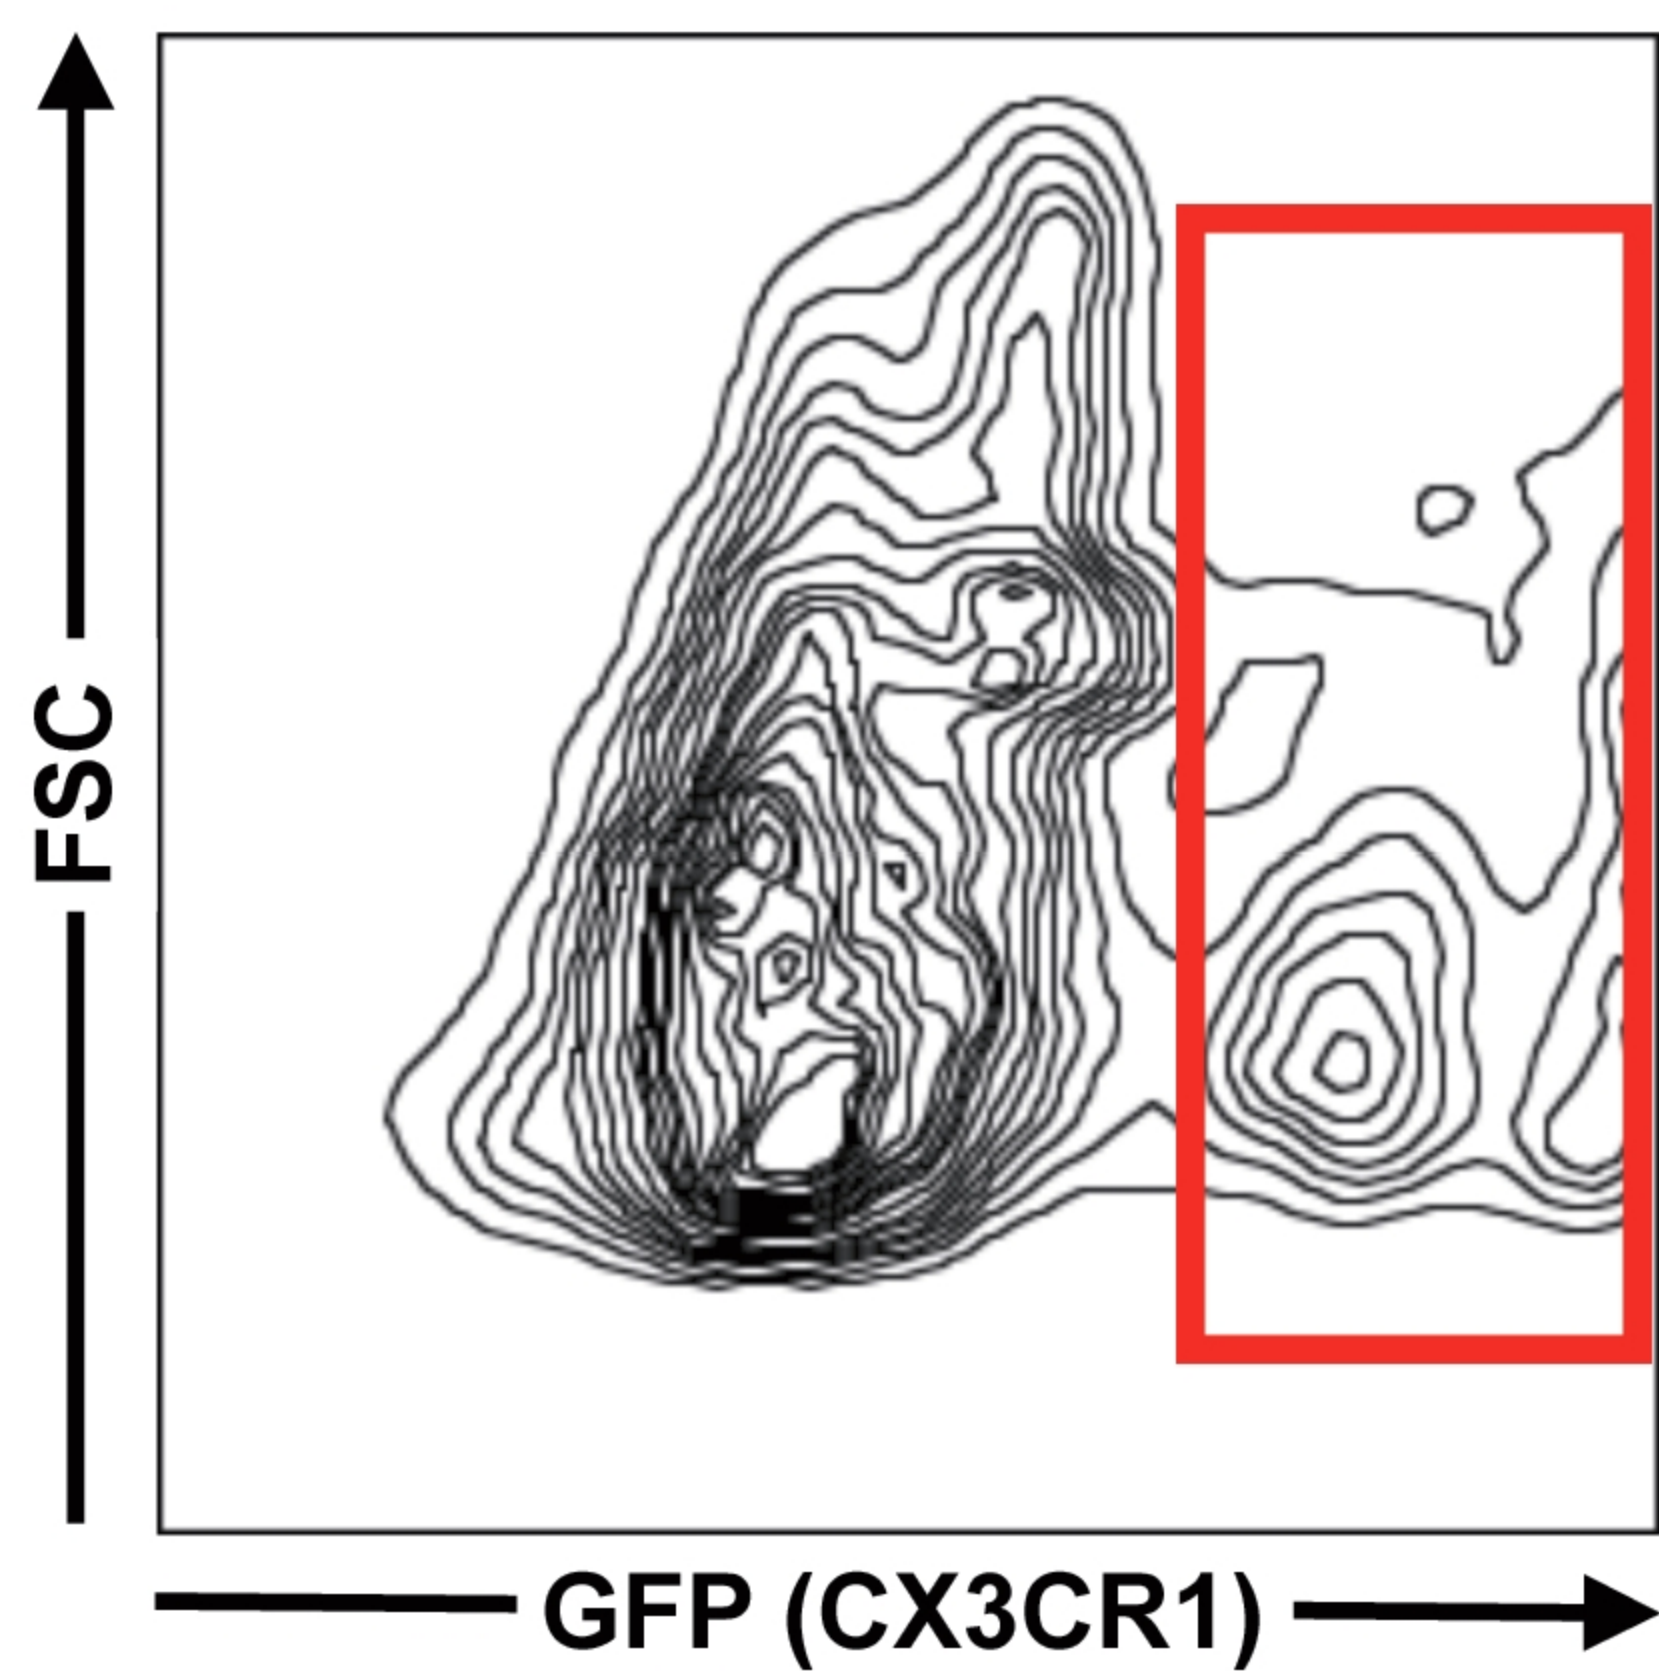

**CX3CR1+**

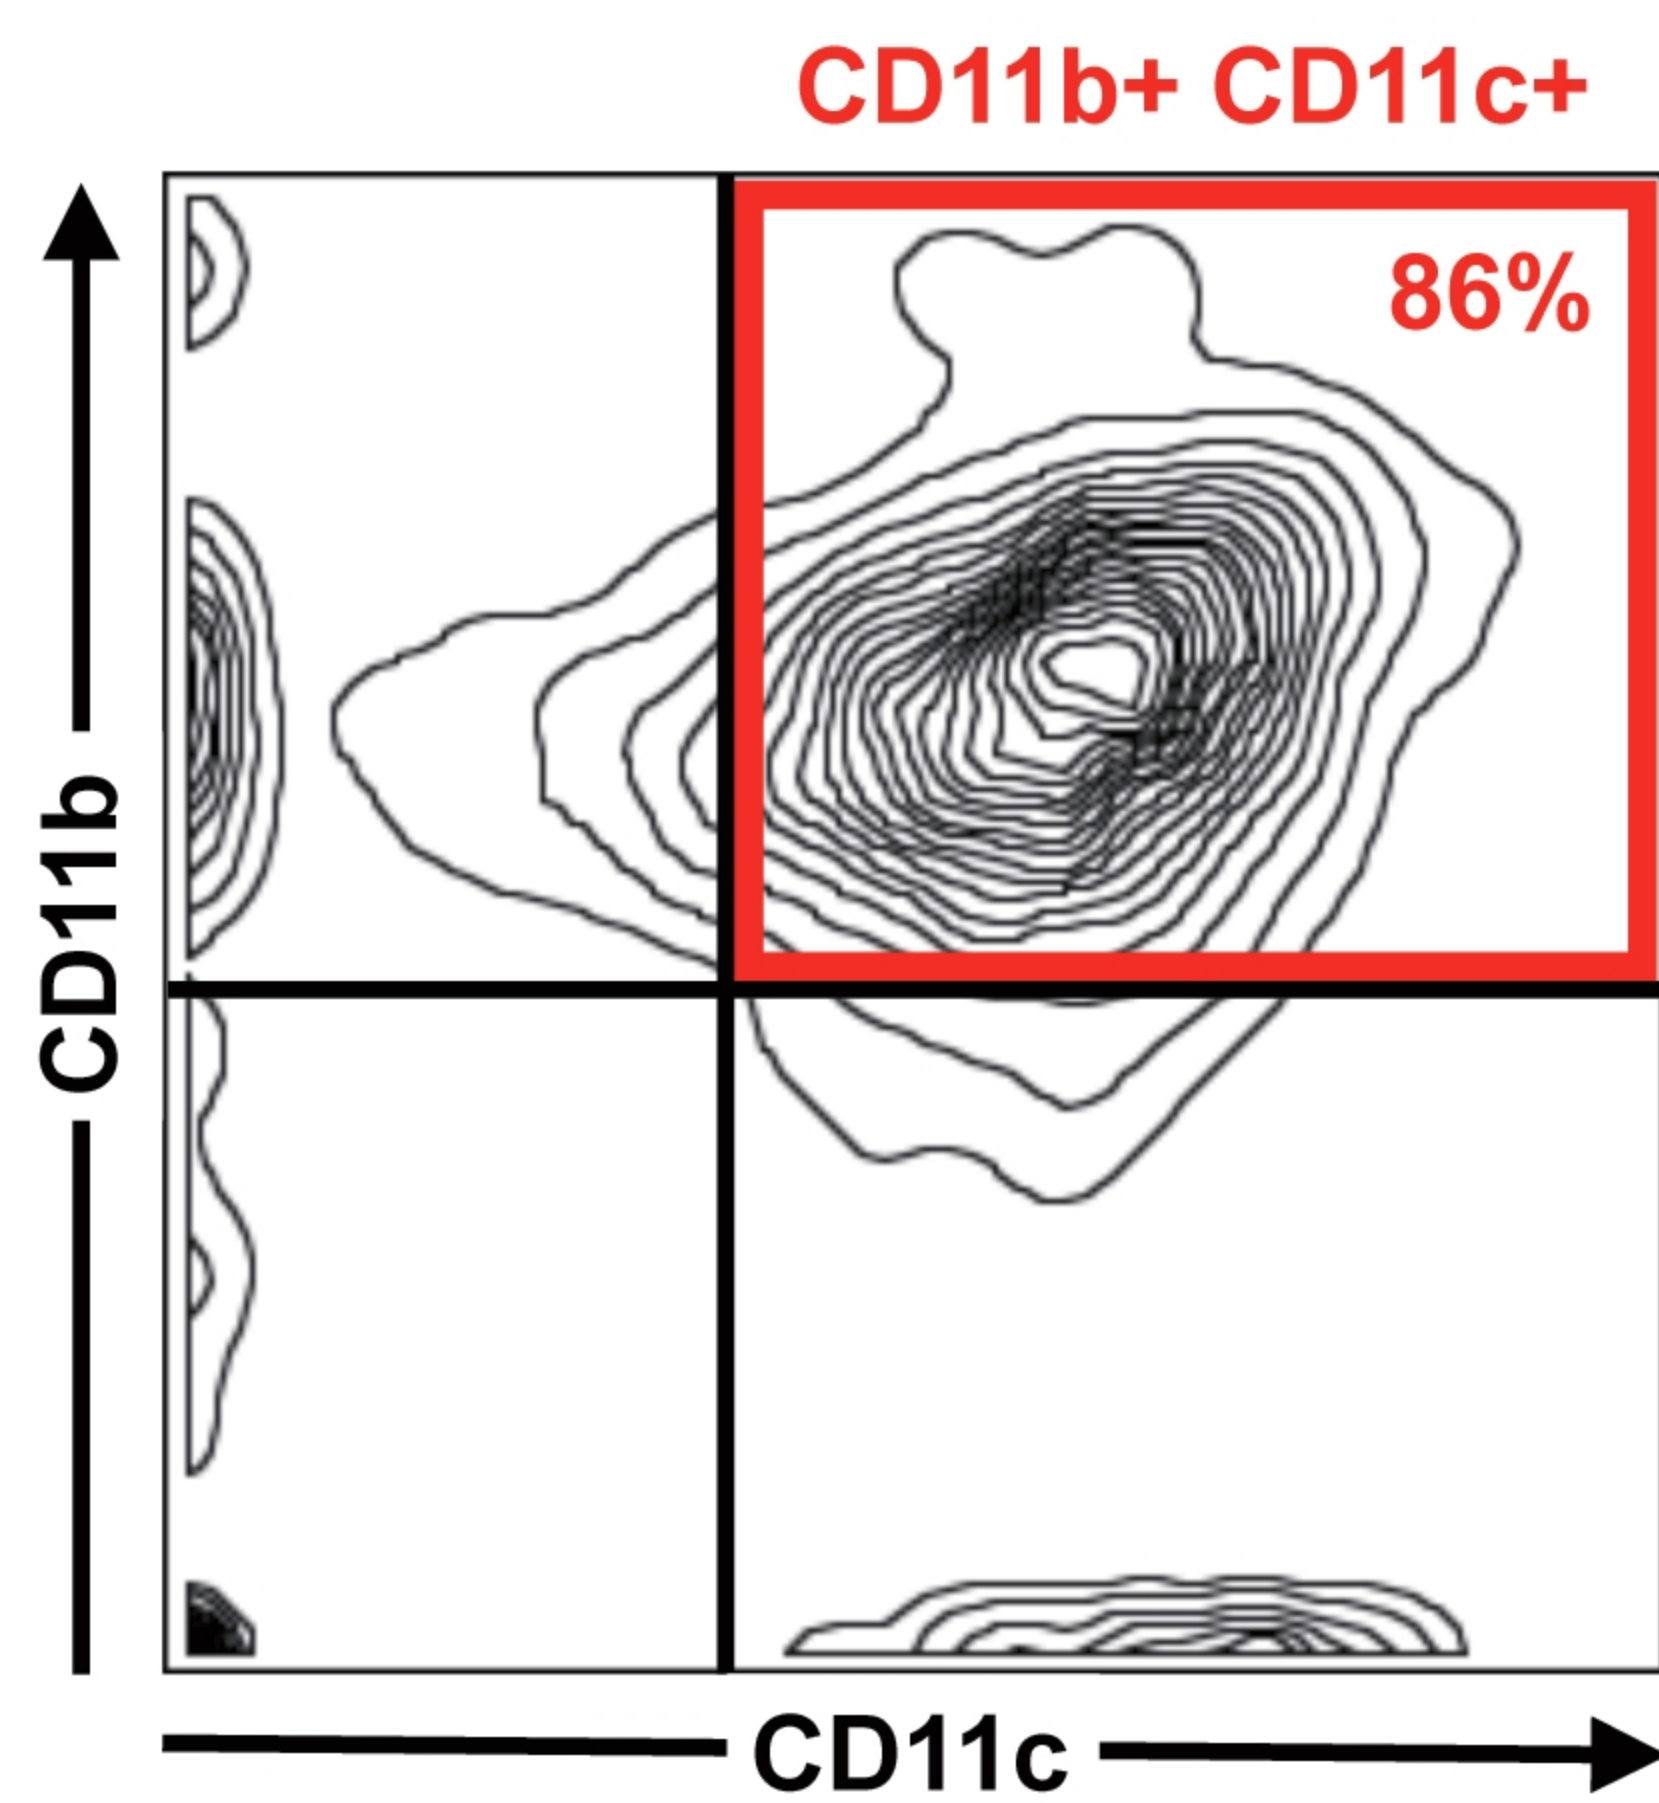

Supplement: NIHMS460533-supplement-Supplementary_Figure_3.pdf [file NIHMS460533-supplement-Supplementary_Figure_3.pdf]
